# Supplementary material for: Sulfur doped FeOx nanosheet arrays supported on nickel foam for efficient alkaline seawater splitting
Source: Royal Society of Chemistry journal article supplement (doi:10.1039/d1dt02506f), 2021-01-01
Supplement: d1dt02506f1.pdf [file d1dt02506f1.pdf]

## Electronic Supplementary Information

### **Sulfur Doped FeO<sub>x</sub> Nanosheet Arrays Supported on Nickel Foam for Efficient Alkaline Seawater Splitting**

Weiju Hao<sup>a</sup>, jinli Fan<sup>a</sup>, Xia Xu<sup>a\*</sup>, Yiran Zhang<sup>a</sup>, Haiyang Lv<sup>a</sup>, Shige Wang<sup>a</sup>, Shengwei Deng<sup>c</sup>, Shuo Weng<sup>a\*</sup>, Yanhui Guo<sup>b\*</sup>

<sup>a</sup>University of Shanghai for Science and Technology, Shanghai, 200093, China.

<sup>b</sup>Fudan University, Shanghai 200433, P. R. China

<sup>c</sup>College of Chemical Engineering, Zhejiang University of Technology, Hangzhou, 310014, China

\* Corresponding authors.

E-mail: [ecustwengs@163.com](mailto:ecustwengs@163.com)

[gyh@fudan.edu.cn](mailto:gyh@fudan.edu.cn)

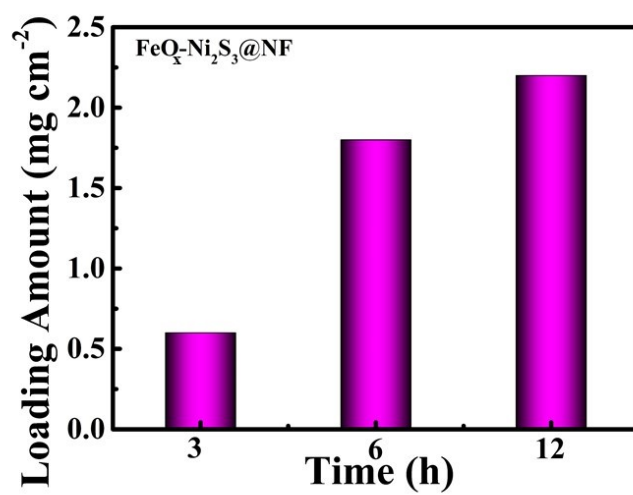

**Figure S1.** The loading amount of FeO<sub>x</sub>-Ni<sub>3</sub>S<sub>2</sub> catalyst material on NF at 3 h, 6 h and 12 h, respectively.

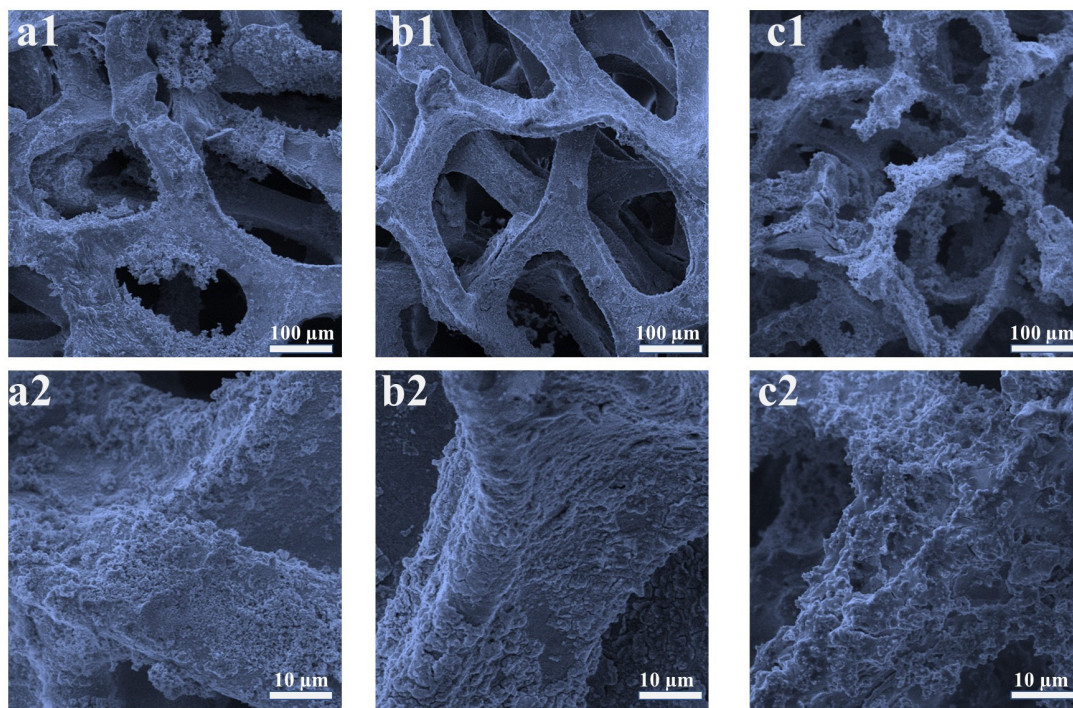

**Figure S2.** FESEM images of the  $\text{FeO}_x\text{-Ni}_3\text{S}_2\text{@NF}$  composite with hydrothermal for (a) 3 h, (b) 6 h and (c) 12 h.

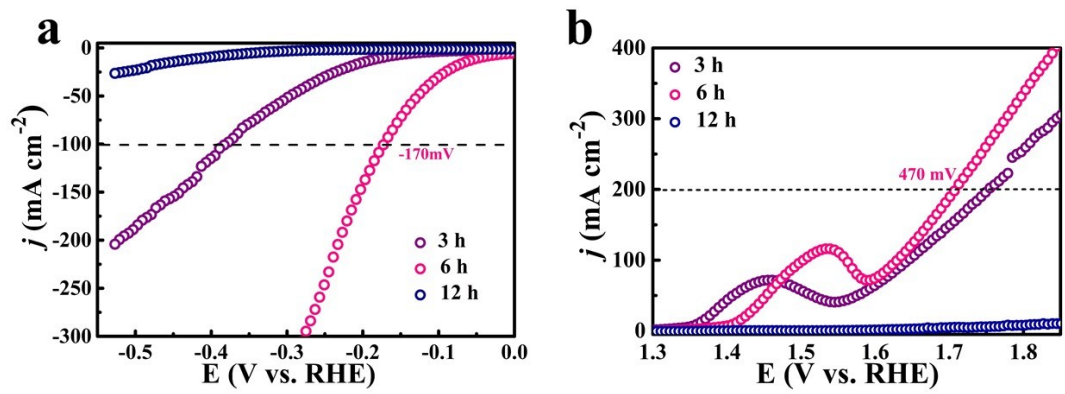

**Figure S3.** LSV curves of FeO<sub>x</sub>-Ni<sub>3</sub>S<sub>2</sub>@NF for HER (a) and OER (b) in 1.0 M KOH+0.5 M KOH with different hydrothermal time.

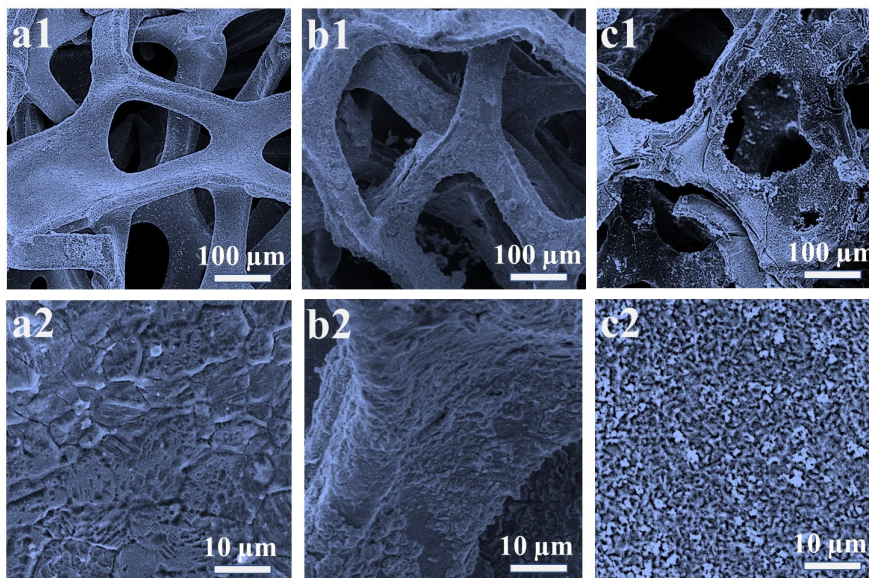

Figure S4. The influence of the amount of thiourea doping on the morphology. (a) Without S; (b) Fe:S=1:1; (c) Fe:S=1:2.

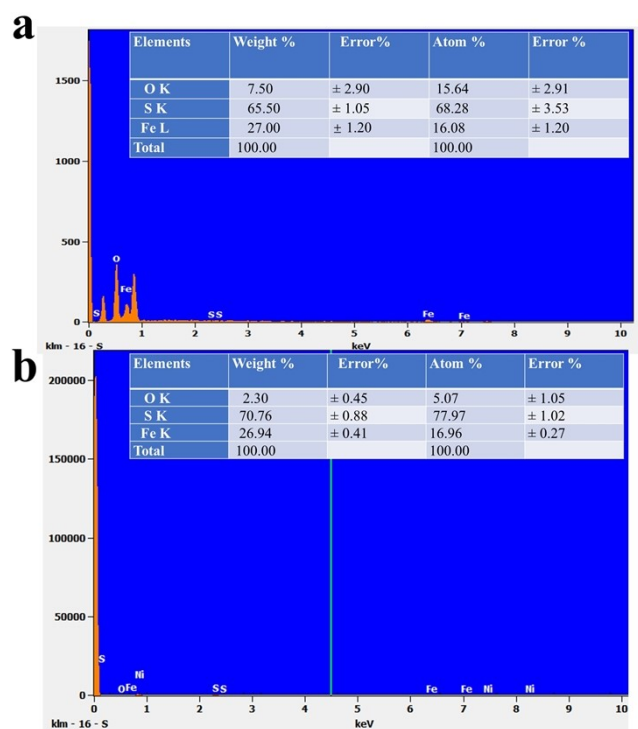

Figure S5. The influence of the amount of thiourea doping on the composition of  $\text{FeO}_x\text{-Ni}_3\text{S}_2@\text{NF}$ . (a) Fe:S=1:1; (b) Fe:S=1:2.

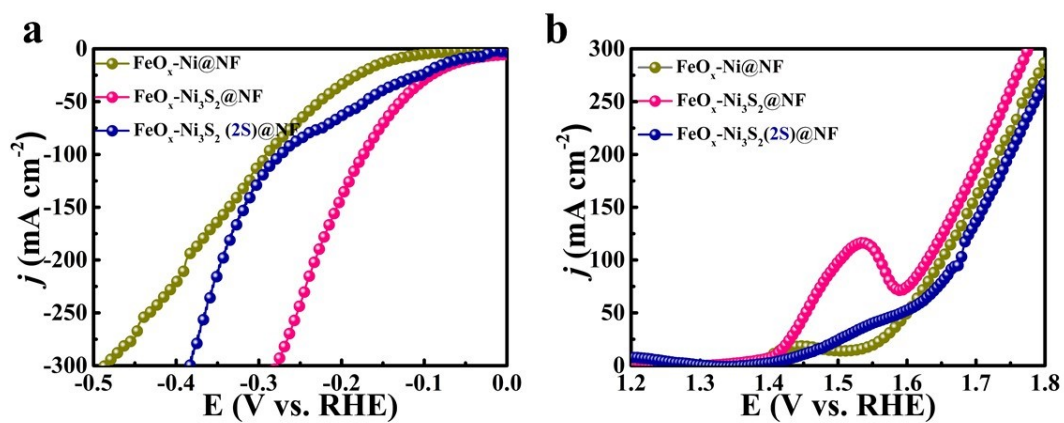

**Figure S6.** Polarization curves of FeO<sub>x</sub>-Ni@NF for HER (a) and OER (b) in 1.0 M KOH with different sulfur source doping amount.



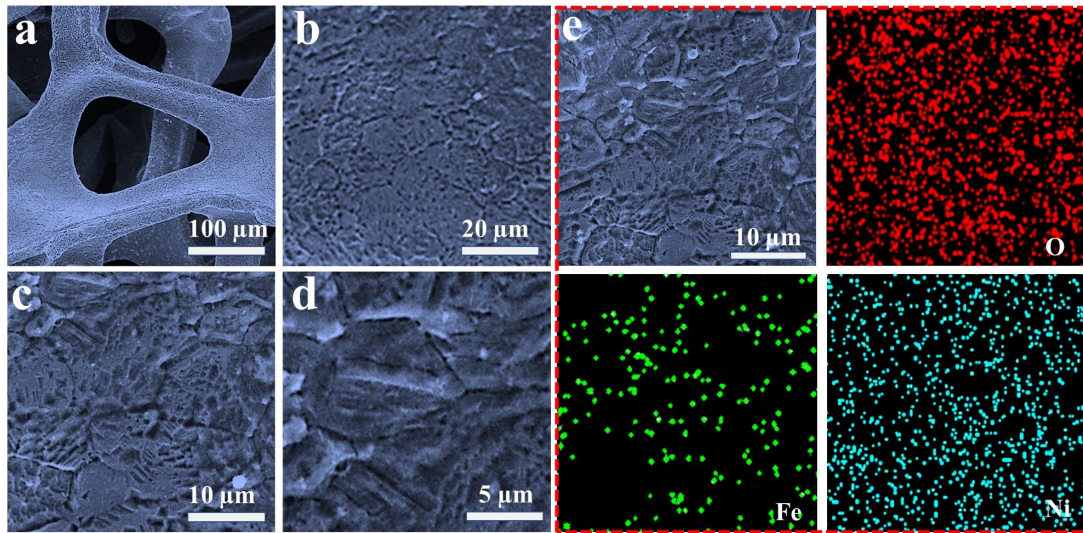

**Figure S7.** FESEM (a-d) and EDS (e) mapping images of  $\text{FeO}_x\text{-Ni@NF}$  electrode.



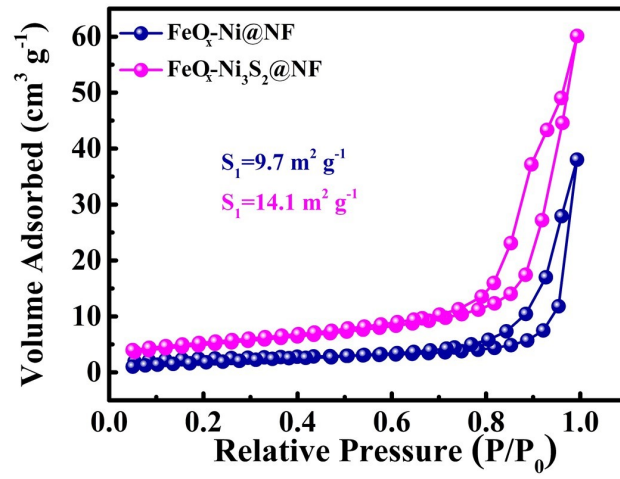

**Figure S8.** Nitrogen isotherms of the FeO<sub>x</sub>-Ni@NF and FeO<sub>x</sub>-Ni<sub>3</sub>S<sub>2</sub>@NF electrodes in nitrogen.

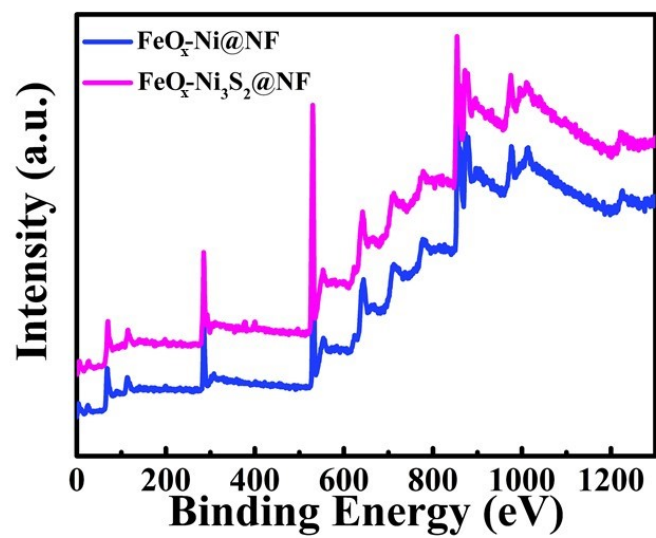

**Figure S9.** The survey XPS spectrum of the  $\text{FeO}_x\text{-Ni@NF}$  and  $\text{FeO}_x\text{-Ni}_3\text{S}_2\text{@NF}$  composite.

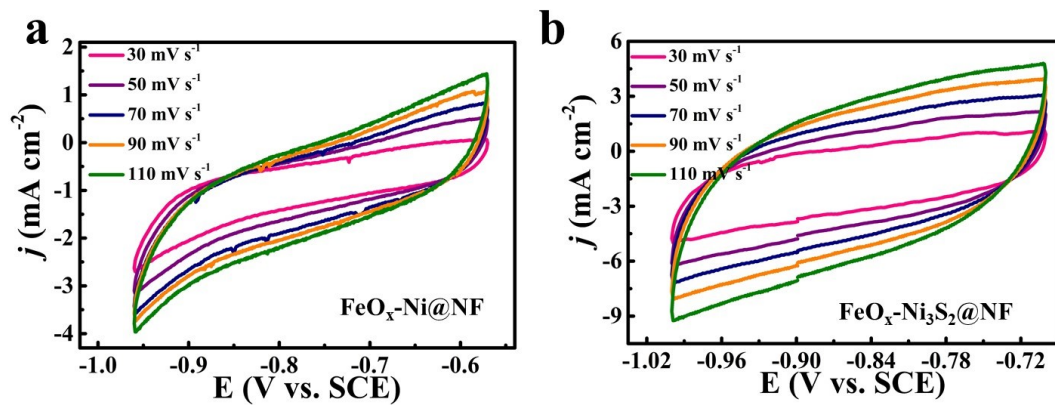

**Figure S10.** Cyclic voltammograms of (a)  $\text{FeO}_x\text{-Ni@NF}$  and (b)  $\text{FeO}_x\text{-Ni}_3\text{S}_2\text{@NF}$  electrode in the non-Faradaic current range at scan rates of 10, 30, 50, 70 and 90  $\text{mV s}^{-1}$  for HER.

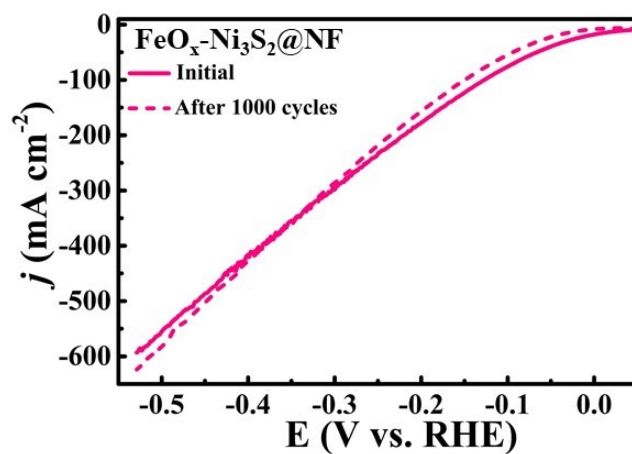

**Figure S11.** The LSV curves of  $\text{FeO}_x\text{-Ni}_3\text{S}_2\text{@NF}$  electrode before and after 1000 CV cycles for HER.

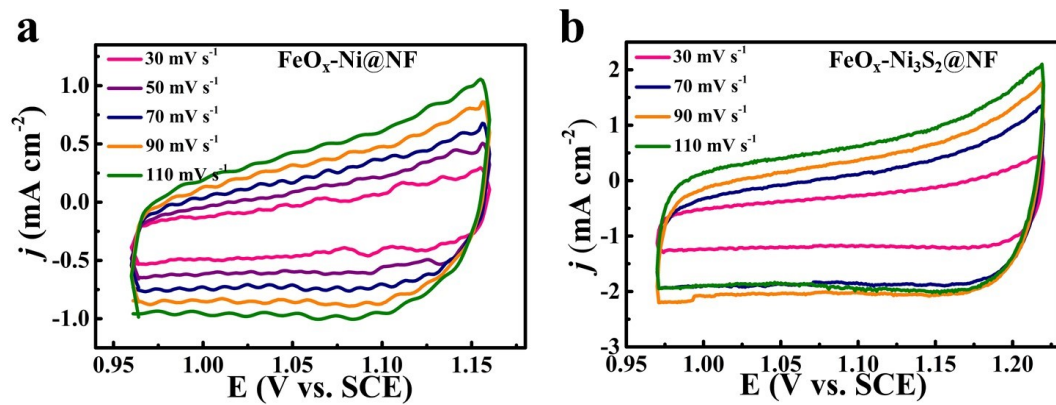

**Figure S12.** Cyclic voltammograms of (a)  $\text{FeO}_x\text{-Ni@NF}$  and (b)  $\text{FeO}_x\text{-Ni}_3\text{S}_2\text{@NF}$  electrode in the non-Faradaic current range at scan rates of 30, 50, 70, 90 and 110 mV s $^{-1}$  for OER.

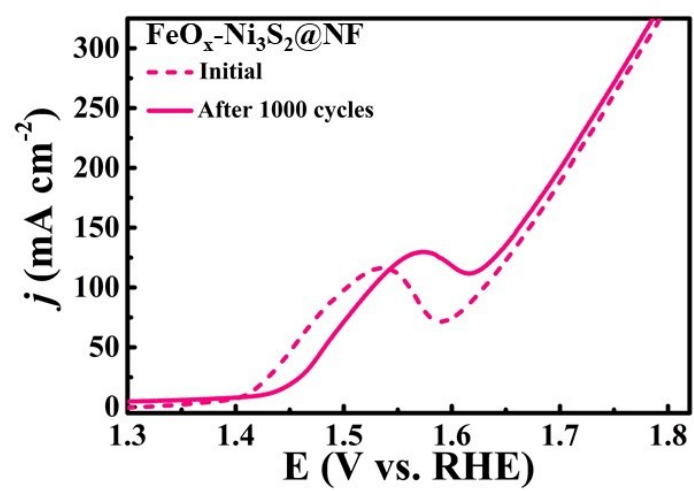

**FigureS13.** The LSV curves of  $\text{FeO}_x\text{-Ni}_3\text{S}_2\text{@NF}$  electrode before and after 1000 CV cycles for OER.



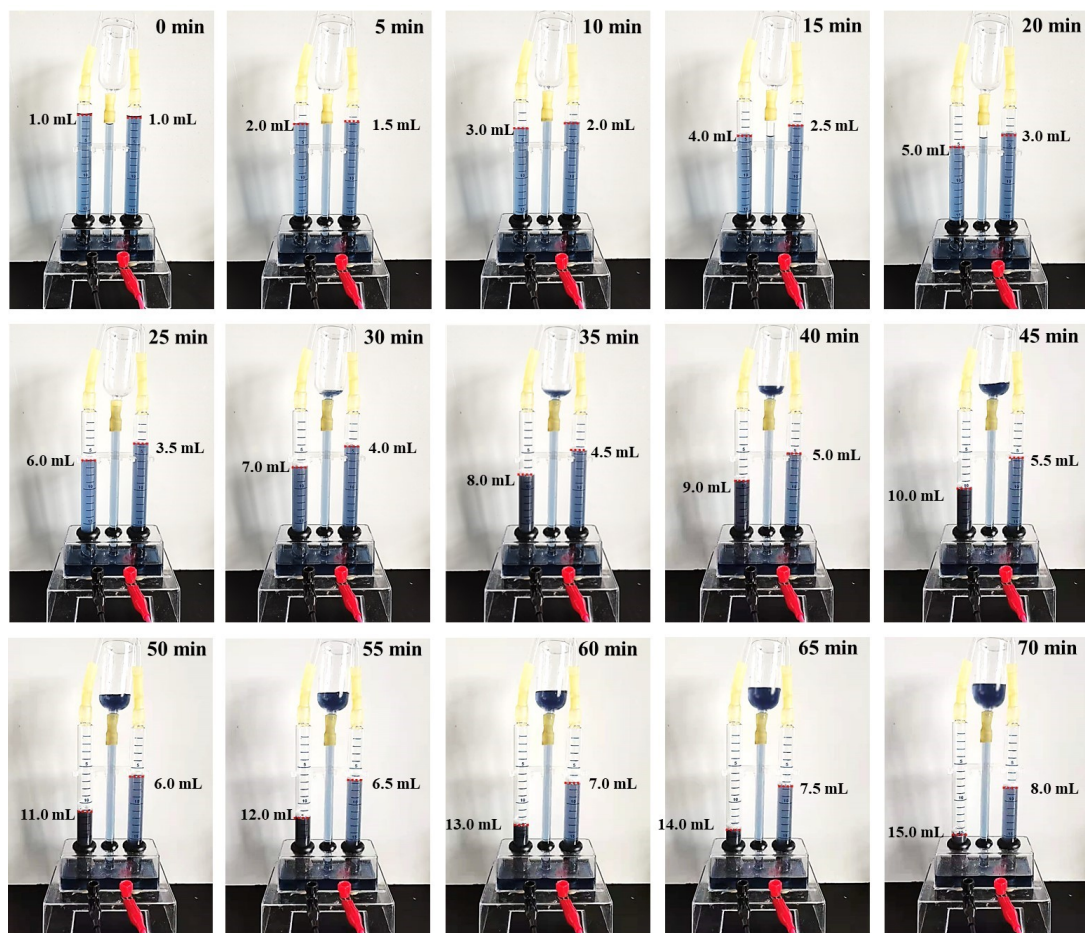

**Figure S14.** Collection of hydrogen ( $H_2$ ) and oxygen ( $O_2$ ) in water splitting in 1.0 M KOH+0.5 M NaCl at the  $100 \text{ mA cm}^{-2}$ .

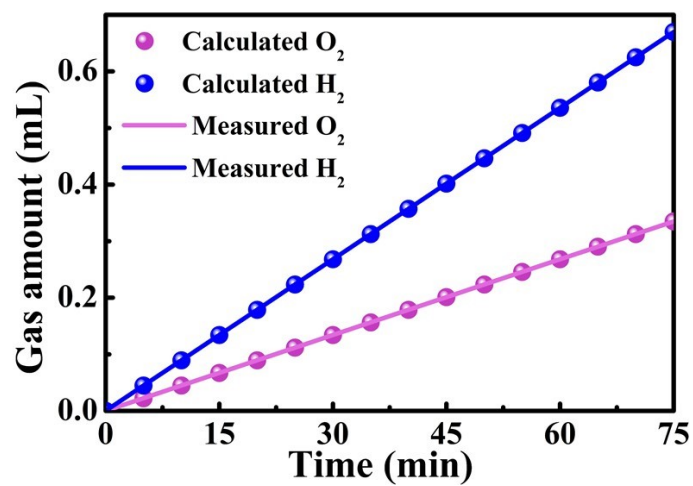

**Figure S15.** Amount of gas theoretically calculated and experimentally measured versus time for FeO<sub>x</sub>-Ni<sub>3</sub>S<sub>2</sub>@NF || FeO<sub>x</sub>-Ni<sub>3</sub>S<sub>2</sub>@NF.

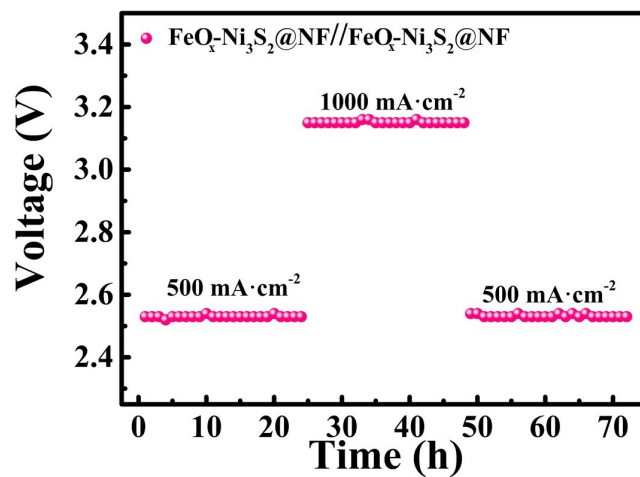

**Figure S16.** Long-term stability test of  $\text{FeO}_x\text{-Ni}_3\text{S}_2\text{@NF}$  electrode at current densities of  $500 \text{ mA cm}^{-2}$ ,  $1000 \text{ mA cm}^{-2}$  and  $500 \text{ mA cm}^{-2}$  for overall water splitting in 1.0 M KOH+0.5 M NaCl over 72 h.

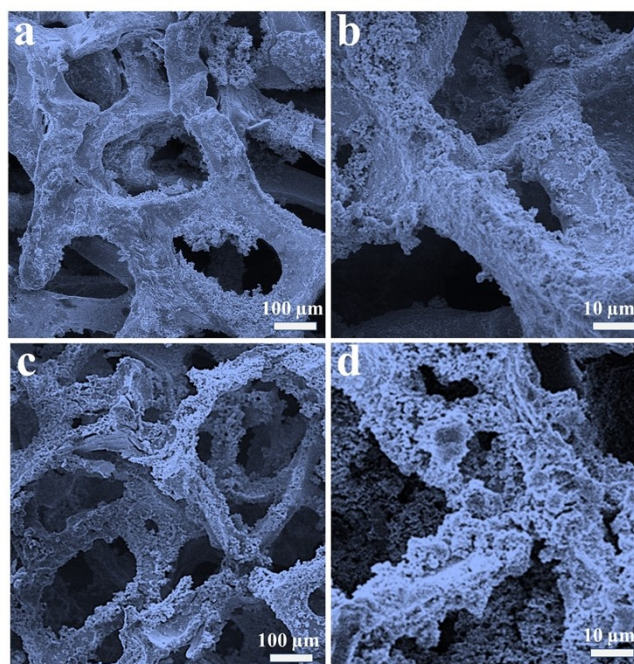

**Figure S17.** The SEM of  $\text{FeO}_x\text{-Ni}_3\text{S}_2\text{@NF}$  electrode for HER (a, b) and OER (c, d) at  $200 \text{ mA cm}^{-2}$  in  $1.0 \text{ M KOH}+0.5 \text{ M NaCl}$  after 100 h.

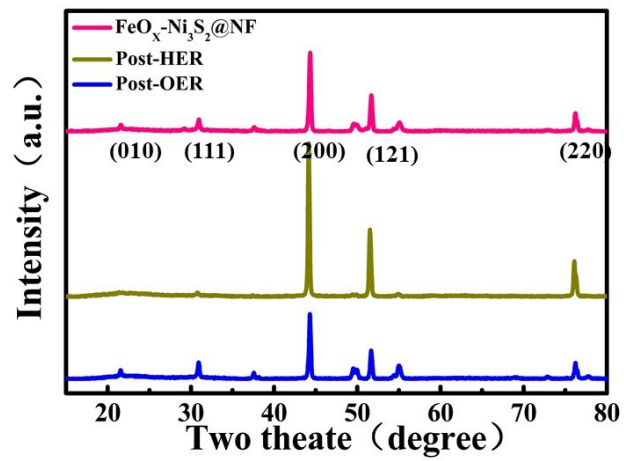

**Figure S18.** The XRD of  $\text{FeO}_x\text{-Ni}_3\text{S}_2\text{@NF}$  electrode for HER and OER at 200 mA  $\text{cm}^{-2}$  in 1.0 M KOH+0.5 M NaCl after 100 h.

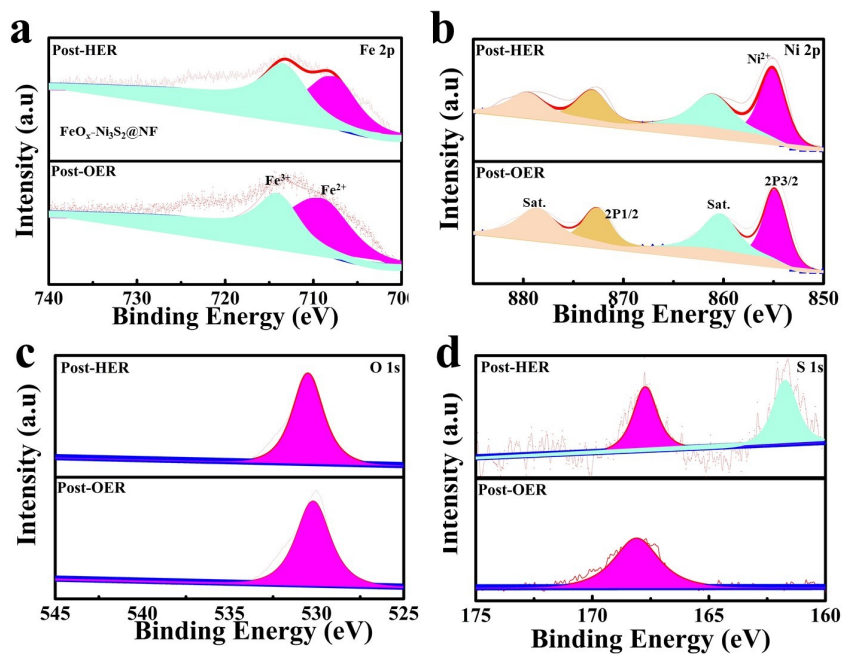

**Figure S19.** High-resolution XPS of  $\text{FeO}_x\text{-Ni}_3\text{S}_2\text{@NF}$  electrodes for HER and OER at  $200 \text{ mA cm}^{-2}$  in  $1.0 \text{ M KOH}+0.5 \text{ M NaCl}$  after 100 h. (a) Fe2p; (b) Ni2p; (c) O1s and (d) S1s.



| <b>Catalyst</b>                                       | <b>State</b> | <b>Atomic Ratio Fe : S</b> |
|-------------------------------------------------------|--------------|----------------------------|
| <b>FeO<sub>x</sub>-Ni<sub>3</sub>S<sub>2</sub>@NF</b> |              | 1:4.9                      |
|                                                       | Post-HER     | 1:4.1                      |
|                                                       | Post-OER     | 1:3.4                      |

**Table S1.** ICP-AES analysis of the FeO<sub>x</sub>-Ni<sub>3</sub>S<sub>2</sub>@NF electrode

**Table S2.** Comparison the HER performance of FeO<sub>x</sub>-Ni<sub>3</sub>S<sub>2</sub>@NF electrode with other electrocatalysts in 1.0 M KOH.

| Catalysts                                                                 | j (mA cm <sup>-2</sup> ) |            | Taf slope<br>(mV dec <sup>-1</sup> ) | References                                                    |
|---------------------------------------------------------------------------|--------------------------|------------|--------------------------------------|---------------------------------------------------------------|
|                                                                           | 10                       | 100        |                                      |                                                               |
| <b>FeO<sub>x</sub>-Ni<sub>3</sub>S<sub>2</sub>@NF</b>                     | <b>52</b>                | <b>178</b> | <b>57</b>                            | <b>This Work</b>                                              |
| Ni Foam/P-CoMoO <sub>4</sub> -350                                         | 94                       | 197        | 93                                   | Adv. Sci. <b>2020</b> , 7, 1903674                            |
| H-MoS <sub>2</sub> /MoP                                                   | 92                       | -          | 59.8                                 | Small <b>2020</b> , 16, 2002482                               |
| NiO/Ru@PNS                                                                | 39                       | -          | 75                                   | J. Mater. chem. A, <b>2019</b> , 7, 2344-2350                 |
| H-NiFe LDH                                                                | 59                       | -          | 62.3                                 | Energy Environ. Sci., <b>2019</b> , 12, 572-581               |
| Pt/np-Co <sub>0.85</sub> Se                                               | 55                       | -          | 35                                   | Nature Communications, <b>2019</b> , 10, 1743                 |
| MoS <sub>2</sub> -MoP/NC                                                  | 35                       | 69         | 30                                   | Nano Energy, <b>2020</b> , 78, 105253                         |
| Co, Mo <sub>2</sub> C-CNF                                                 | 128                      | -          | 60                                   | Chemical Engineering Journal <b>2020</b> , 125481             |
| MoP/0.5CM-CDs1100                                                         | 70                       | -          | 77.49                                | Nano Energy <b>2020</b> , 72, 104730                          |
| CC@N-CoP                                                                  | 42                       | -          | 41.2                                 | Adv. Mater. <b>2018</b> , 1800140                             |
| Mo <sub>2</sub> N /CeO <sub>2</sub> @NF                                   | 26                       | -          | 37.8                                 | ACS Appl. Mater. Interfaces <b>2020</b> , 12, 26, 29153-29161 |
| b-S-Ni <sub>3</sub> Se <sub>4</sub> Se-Ni <sub>3</sub> S <sub>2</sub> /NF | 89                       | -          | 61                                   | Nano Energy <b>2020</b> , 74, 104787                          |
| Ni <sub>2</sub> P-Ni <sub>12</sub> P <sub>5</sub> / NF                    | 76                       | 147        | 68                                   | Small <b>2020</b> , 06770                                     |
| VS <sub>2</sub> -Mo-10                                                    | 243                      | -          | 52.6                                 | Chemical Engineering Journal <b>2020</b> , 396 125227         |
| Re <sub>1-x</sub> Mo <sub>x</sub> Se <sub>2</sub>                         | 77                       | -          | 42                                   | ACS Nano <b>2020</b> , 14, 9, 11995–12005                     |
| Mo <sub>6</sub> Te <sub>6</sub> /MoS <sub>2</sub> (1-x) Te <sub>2x</sub>  | 320                      | -          | 55.7                                 | Small <b>2020</b> , 2004296                                   |
| N-LDH/2D-Pt                                                               | 31                       | -          | 32.3                                 | ACS Nano <b>2020</b> , 14, 8, 10578–10588                     |
| Ru SAs-Ni <sub>2</sub> P                                                  | 57                       | -          | 75                                   | Nano Energy <b>2020</b> , 105467                              |
| Fe-Ni <sub>3</sub> S <sub>2</sub> @FeNi <sub>3</sub>                      | 105                      | -          | 69                                   | Chemical Engineering Journal <b>2020</b> , 396, 125315        |
| (Ni <sub>0.75</sub> Fe <sub>0.25</sub> ) <sub>2</sub> P@GCs               | 83                       | -          | 70.4                                 | J. Mater. Chem. A, <b>2019</b> , 7, 20357-20368               |
| CoNi/CoFe <sub>2</sub> O <sub>4</sub> /NF                                 | 82                       | 189        | 45                                   | J. Mater. Chem. A, <b>2018</b> , 6, 19221-19230               |
| NiO/Ru@PNS                                                                | 39                       | -          | 75                                   | J. Mater. Chem. A, <b>2019</b> , 7, 2344-2350                 |

**Table S3.** Comparison the OER performance of FeO<sub>x</sub>-Ni<sub>3</sub>S<sub>2</sub>@NF electrode with other electrocatalysts in 1.0 M KOH.

| Catalysts                                            | OER ( 10 mA cm <sup>-2</sup> ) | Tafel Slope (mV dec <sup>-1</sup> ) | References                                      |
|------------------------------------------------------|--------------------------------|-------------------------------------|-------------------------------------------------|
| FeO <sub>x</sub> -Ni <sub>3</sub> S <sub>2</sub> @NF | 196                            | 62                                  | This work                                       |
| CoNi-OH                                              | 270                            | 73.5                                | Chem. Eng. J. <b>2020</b> , 401,126092          |
| Ru-HPC                                               | 310                            | 60.7                                | Nano Energy <b>2019</b> , 58, 1-10              |
| FeNi <sub>3</sub> S <sub>2</sub> /NF                 | 214                            | 42                                  | ACS Catal. <b>2018</b> , 8, 5431-5441           |
| NiFeMo                                               | 238                            | 35                                  | ACS Energy Lett. <b>2018</b> , 3, 546-554       |
| NiCoP@NC<br>NA/NF                                    | 215                            | 70.5                                | Adv. Funct. Mater. <b>2019</b> , 29, 1906316    |
| δ-FeOOH<br>NSs/NF                                    | 265                            | 36                                  | Adv. Mater. <b>2018</b> , 30, 1803144           |
| Ni <sub>2</sub> P-VP <sub>2</sub>                    | 220                            | 49                                  | Adv. Mater. <b>2019</b> , 31, 1901174           |
| Ni/Ni(OH) <sub>2</sub> @NF                           | 270                            | 53                                  | Adv. Mater. <b>2020</b> , 32, 1906915           |
| Ni-Fe-Mo/NF                                          | 255                            | 35                                  | Adv. Sci. <b>2020</b> , 7, 1902034              |
| Ni-ZIF/Ni-<br>B@NF                                   | 234                            | 76                                  | Adv. Energy Mater. <b>2020</b> , 10, 1902714    |
| Ni/FeOOH@NF                                          | 239                            | 70.5                                | J. Mater. Chem. A, <b>2020</b> , 8, 12603–12612 |
| YP-Co(OH)F                                           | 238                            | 67                                  | Small <b>2019</b> , 15, 1904105                 |
| Co <sub>6</sub> W <sub>6</sub> C@NC                  | 286                            | 53.96                               | Small <b>2020</b> , 16, 1907556                 |
| Ni-Ni <sub>3</sub> C/CC                              | 299                            | 43.8                                | Small <b>2020</b> , 16, 2001642                 |
| Fe <sub>x</sub> Ni <sub>3-x</sub> S <sub>2</sub> @NF | 252                            | 64                                  | Adv. Energy Mater. <b>2020</b> , 10, 2001963    |
| NiFe LDH                                             | 187                            | 34.42                               | Energy Environ. Sci., <b>2019</b> , 12, 572-581 |
| 2D NiCoFe/NF                                         | 240                            | 58                                  | Nanoscale, <b>2018</b> , 10, 12975–12980        |

**Table S4.** The overall-water splitting performance for FeO<sub>x</sub>-Ni<sub>3</sub>S<sub>2</sub>@NF and other electrodes with NF-base electrocatalysts in 1.0 M KOH.

| Catalysts                                                                            | Current Density<br>(mA cm <sup>-2</sup> ) |             | References                                       |
|--------------------------------------------------------------------------------------|-------------------------------------------|-------------|--------------------------------------------------|
|                                                                                      | 10                                        | 100         |                                                  |
| <b>FeO<sub>x</sub>-Ni<sub>3</sub>S<sub>2</sub>@NF</b>                                | <b>1.41</b>                               | <b>1.61</b> | <b>This Work</b>                                 |
| CoNi/CoFe <sub>2</sub> O <sub>4</sub> /Ni                                            | 1.57                                      | 1.75        | J. Mater. Chem. A, <b>2018</b> , 6,19221         |
| MoS <sub>2</sub> /Co <sub>9</sub> S <sub>8</sub> /Ni <sub>3</sub> S <sub>2</sub> /Ni | 1.54                                      |             | J. Am. Chem. Soc. <b>2019</b> , 141, 10417–10430 |
| NiFeMo/NF                                                                            | 1.45                                      |             | ACS Energy Lett. <b>2018</b> , 3, 546–554        |
| FePO <sub>4</sub> /NF                                                                | 1.54                                      | 1.72        | Adv. Mater. <b>2017</b> , 29, 1704574            |
| Ni-Ni(OH) <sub>2</sub> /NF                                                           | 1.59                                      |             | Adv. Mater. <b>2020</b> , 32, 1906915            |
| NiFeMoOOH/NF                                                                         | 1.5                                       | 1.63        | Adv. Sci. <b>2020</b> , 7, 1902034               |
| Ni-ZIF/Ni-B@NF                                                                       | 1.54                                      |             | Adv. Energy Mater. <b>2020</b> , 10, 1902714     |
| NiP <sub>2</sub> /Ni <sub>2</sub> P@Ni                                               | 1.54                                      |             | J. Am. Chem. Soc. <b>2019</b> , 141, 10417–10430 |
| YP-Co(OH)F                                                                           | 1.54                                      |             | Small <b>2019</b> , 15, 1904105                  |
| Co <sub>6</sub> W <sub>6</sub> C@NC                                                  | 1.585                                     |             | Small <b>2020</b> , 16, 1907556                  |
| Ni-Ni <sub>3</sub> C/CC                                                              | 1.64                                      |             | Small <b>2020</b> , 16, 2001642                  |
| Ni/Ni(OH) <sub>2</sub> /NF                                                           | 1.59                                      |             | Adv. Mater. 2020, 32, 1906915                    |
| NiFe-Mo/OOH@NF                                                                       | 1.5                                       | 1.63        | Adv. Sci. <b>2020</b> , 7, 1902034               |
| h-NiS <sub>x</sub> /NF                                                               | 1.54                                      | 1.72        | Adv. Mater. <b>2017</b> , 29, 1704574            |
| δ-FeOOH NSs/NF                                                                       | 1.62                                      |             | Adv. Mater. <b>2018</b> , 30, 1803144            |
| NixCo <sub>2-x</sub> P@NC                                                            | 1.56                                      |             | Adv. Funct. Mater. <b>2019</b> , 29, 1906316     |
| Fe-Ni <sub>3</sub> S <sub>2</sub> /NF                                                | 1.54                                      |             | ACS Catal. <b>2018</b> , 8, 5431–5441            |
| Ni <sub>3</sub> N-VN/NF                                                              | 1.51                                      |             | Adv. Mater. <b>2019</b> , 31, 1901174            |
| Ni/Mo <sub>2</sub> C(1:2)-NCNFs                                                      | 1.64                                      |             | Adv. Energy Mater. <b>2019</b> , 9, 1803185      |
